# Supplementary material for: Non-invasive screening for subclinical liver graft injury in adults via donor-specific anti-HLA antibodies
Source: PubMed Central journal article supplement (PMC7455737; doi:10.1038/s41598-020-70938-7), 2020-08-28

**Non-invasive screening for subclinical liver graft injury in adults via donor-specific anti-HLA antibodies.**

Anne Höfer<sup>1, 2, 3</sup>, Danny Jonigk<sup>4</sup>, Björn Hartleben<sup>4</sup>, Murielle Verboom<sup>5</sup>, Michael Hallensleben<sup>5</sup>, Michael P. Manns<sup>1, 3</sup>, Elmar Jaeckel<sup>1, 2, 3</sup>, \*Richard Taubert<sup>1, 2, 3</sup>

<sup>1</sup> Department of Gastroenterology, Hepatology and Endocrinology, Hannover Medical School, Germany

<sup>2</sup> Integrated Research and Treatment Center Transplantation (IFB-Tx), Hannover Medical School, Hannover, Germany

<sup>3</sup> European Reference Network on Hepatological Diseases (ERN RARE-LIVER)

<sup>4</sup> Institute for Pathology, Hannover Medical School, Germany

<sup>5</sup> Institute for Transfusion Medicine and Transplant Engineering, Hannover Medical School, Germany

**\* Corresponding author email:**

PD Dr. Richard Taubert

taubert.richard@mh-hannover.de

## **Supplementary Information**

### **Supplementary material and methods**

#### **Liver tissue RNA extraction and processing**

Total RNA was extracted according to AllPrep DNA/RNA/Protein Mini protocol (Qiagen, Hilden, Germany) as described previously<sup>1</sup>. The samples of liver tissue homogenized in two steps, first in bead-milling disruption using Tissue Lyser and second using QIAshredder spin column. For isolation intact DNA, RNA and proteins the homogenization was preparing in buffer RLT, which inactivates DNases and RNases as well as proteases. The quality and quantity were assessed with the Agilent 2100 Bioanalyzer (Agilent Technologies, Santa Clara, CA, USA) and Nanodrop ND-1000, respectively. The RNA was then reverse transcribed into cDNA using the Transcriptor High Fidelity cDNA Synthesis Kit (Roche, Basel, Switzerland). Gene lists were taken from previous publications and the published results of the Molecular Microscope System from the Alberta Transplant Applied Genomic Centre (<http://atagc.med.ualberta.ca/Research/GeneLists/Pages/default.aspx>)<sup>2-6</sup> and supplemented with further genes associated with immune regulation (Supplementary Table S1).

A pre-amplification of cDNA over 14 cycles was performed using pooled TaqMan Assays and the TaqMan PreAmp Master Mix following manufacturer's protocol. RT-PCR was performed using the 48.48 and 96.96 Dynamic Array following manufacturer's protocol using a BioMark (Fluidigm Corporation, CA, USA). To quantify transcript levels, target gene Ct values were normalized using Ct values of GAPDH, GUSB, POLR2A as reference genes to generate  $-\Delta\text{Ct}$  values.

## **Analysis of intrahepatic gene expression data**

Principal component analysis (PCA) and heat maps of  $-\Delta\text{Ct}$  values were performed using Qlucore Omics Explorer v3.3 (Qlucore, Lund, Sweden) as recently published<sup>1</sup>. For analysis p values were set of  $\leq 0.049$  to compare groups to each other for two group comparisons (t-test) and multi group comparison (F-test) (ANOVA). False discovery rate (FDR) calculated for correction of multiple t testing  $< 0.1$  was considered significant for all Qlucore analysis.

## **Supplementary Figures**

### **Supplementary Figure S1: Association of DSA with subclinical graft injury and fibrosis after matching for time after transplantation.**

Presence of DSA was associated with the severity of graft injury (HCMini) and at least moderate graft fibrosis in 95 samples with normal/marginally elevated liver enzymes after matching for time after transplantation of samples with and without DSA.

## Supplementary Tables

**Supplementary Table S1: Gene sets for the intrahepatic gene expression analysis.**

| Rejection markers (RM) <sup>2</sup> |                                                   | Endothelial cells markers (ECM) <sup>2</sup> |                                                              | Immunoregulation and iron homeostasis markers (IM) |                                                           | T cell exhaustion markers (TCEM) according to McKinney <i>et al.</i> <sup>4</sup> |                                                  | Spontaneous operational tolerance markers (SOTM) according to Bohne <i>et al.</i> <sup>3</sup> |                                            |
|-------------------------------------|---------------------------------------------------|----------------------------------------------|--------------------------------------------------------------|----------------------------------------------------|-----------------------------------------------------------|-----------------------------------------------------------------------------------|--------------------------------------------------|------------------------------------------------------------------------------------------------|--------------------------------------------|
| Gene symbol                         | Official name                                     | Gene symbol                                  | Official name                                                | Gene symbol                                        | Official name                                             | Gene symbol                                                                       | Official name                                    | Gene symbol                                                                                    | Official name                              |
| ABCB1                               | ATP binding cassette subfamily B member 1         | ADCY4                                        | adenylate cyclase 4                                          | BATF                                               | basic leucine zipper ATF-like transcription factor        | BCL2                                                                              | BCL2, apoptosis regulator                        | CDHR2                                                                                          | cadherin related family member 2           |
| ANXA2                               | annexin A2                                        | CDH5                                         | cadherin 5, type 2                                           | CD3E                                               | CD3e molecule, epsilon                                    | BTLA                                                                              | B and T lymphocyte associated                    | MIF                                                                                            | macrophage migration inhibitory factor     |
| CCL19                               | C-C motif chemokine ligand 19                     | COL4A1                                       | collagen, type IV, alpha 1                                   | CD40LG                                             | CD40 ligand                                               | CD86                                                                              | CD86 molecule                                    | PEBP1                                                                                          | phosphatidylethanolamine binding protein 1 |
| CD2                                 | CD2 molecule                                      | ENPP2                                        | ectonucleotide pyrophosphatase/phosphodiesterase 2           | CD274                                              | CD274 molecule                                            | CD160                                                                             | CD160 molecule                                   | SOCS1                                                                                          | suppressor of cytokine signaling 1         |
| CD8A                                | CD8a molecule                                     | HSPG2                                        | heparan sulfate proteoglycan 2                               | FOXP3                                              | forkhead box P3                                           | CD244                                                                             | CD244 molecule, natural killer cell receptor 2B4 | TFRC                                                                                           | transferrin receptor                       |
| CD19                                | CD19 molecule                                     | IGFBP7                                       | insulin-like growth factor binding protein 7                 | FTH1                                               | ferritin heavy chain 1                                    | CTLA4                                                                             | cytotoxic T-lymphocyte-associated protein 4      |                                                                                                |                                            |
| CD34                                | CD34 molecule                                     | KMT2C                                        | lysine methyltransferase 2C; also known as MLL3              | GATA3                                              | GATA binding protein 3                                    | IL7R                                                                              | interleukin 7 receptor                           |                                                                                                |                                            |
| CD52                                | CD52 molecule                                     | LAMB1                                        | laminin, beta 1                                              | HAMP                                               | hepcidin antimicrobial peptide                            | KAT2B                                                                             | lysine acetyltransferase 2B                      |                                                                                                |                                            |
| CD68                                | CD68 molecule                                     | MFNG                                         | MFNG O-fucosylpeptide 3-beta-N-acetylglucosaminyltransferase | HAVCR2                                             | hepatitis A virus cellular receptor 2; also known as TIM3 | KLRC1                                                                             | killer cell lectin like receptor C1              |                                                                                                |                                            |
| CD83                                | CD83 molecule                                     | MSL3                                         | male-specific lethal 3                                       | HGF                                                | hepatocyte growth factor                                  | KLRG1                                                                             | killer cell lectin like receptor G1              |                                                                                                |                                            |
| CXCL8                               | C-X-C motif chemokine ligand 8; also known as IL8 | OPN3                                         | opsin 3                                                      | IFNG                                               | interferon gamma                                          | LAG3                                                                              | lymphocyte-activation gene 3                     |                                                                                                |                                            |
| CXCL9                               | chemokine (C-X-C motif) ligand 9                  | PAK2                                         | p21 protein (Cdc42/Rac)-activated kinase 2                   | IL2                                                | interleukin 2                                             | LILRB4                                                                            | leukocyte immunoglobulin like receptor B4        |                                                                                                |                                            |
| CXCL10                              | chemokine (C-X-C motif) ligand 10                 | RGS5                                         | regulator of G-protein signaling 5                           | IL6                                                | interleukin 6                                             | PDCD1                                                                             | programmed cell death 1                          |                                                                                                |                                            |

|          |                                                            |       |                                                                    |        |                                                       |         |                                   |   |
|----------|------------------------------------------------------------|-------|--------------------------------------------------------------------|--------|-------------------------------------------------------|---------|-----------------------------------|---|
| DHRS9    | dehydrogenase/reductase (SDR family) member 9              | SELP  | selectin P                                                         | IL10   | interleukin 10                                        | PTGER2  | prostaglandin receptor 2          | E |
| FABP5    | fatty acid binding protein 5                               | S1PR1 | sphingosine-1-phosphate receptor 1                                 | IL17A  | interleukin 17A                                       | TNFRSF9 | TNF receptor superfamily member 9 |   |
| GBP2     | guanylate binding protein 2, interferon-inducible          | TRPV2 | transient receptor potential cation channel, subfamily V, member 2 | LRRC32 | leucine rich repeat containing 32; also known as GARP |         |                                   |   |
| GPNMB    | glycoprotein (transmembrane) nmb                           |       |                                                                    | RORC   | RAR related orphan receptor C                         |         |                                   |   |
| GZMB     | granzyme B                                                 |       |                                                                    | TBX21  | T-box 21                                              |         |                                   |   |
| HLA-DMA  | major histocompatibility complex, class II, DM alpha       |       |                                                                    |        |                                                       |         |                                   |   |
| HLA-DQB1 | major histocompatibility complex, class II, DQ beta 1      |       |                                                                    |        |                                                       |         |                                   |   |
| HLA-DRA  | major histocompatibility complex, class II, DR alpha       |       |                                                                    |        |                                                       |         |                                   |   |
| HLA-F    | major histocompatibility complex, class I, F               |       |                                                                    |        |                                                       |         |                                   |   |
| IL18BP   | interleukin 18 binding protein                             |       |                                                                    |        |                                                       |         |                                   |   |
| IL32     | interleukin 32                                             |       |                                                                    |        |                                                       |         |                                   |   |
| IRF1     | interferon regulatory factor 1                             |       |                                                                    |        |                                                       |         |                                   |   |
| ITM2A    | integral membrane protein 2A                               |       |                                                                    |        |                                                       |         |                                   |   |
| LYZ      | lysozyme (renal amyloidosis)                               |       |                                                                    |        |                                                       |         |                                   |   |
| MMP9     | matrix metalloproteinase 9                                 |       |                                                                    |        |                                                       |         |                                   |   |
| PARVG    | parvin gamma                                               |       |                                                                    |        |                                                       |         |                                   |   |
| PLA2G7   | phospholipase A2 group VII                                 |       |                                                                    |        |                                                       |         |                                   |   |
| RFX5     | regulatory factor X5                                       |       |                                                                    |        |                                                       |         |                                   |   |
| SLC1A3   | solute carrier family 1 member 3                           |       |                                                                    |        |                                                       |         |                                   |   |
| STAT1    | signal transducer and activator of transcription 1         |       |                                                                    |        |                                                       |         |                                   |   |
| TAP1     | transporter 1, ATP-binding cassette, subfamily B (MDR/TAP) |       |                                                                    |        |                                                       |         |                                   |   |
| TGFB1    | transforming growth factor beta 1                          |       |                                                                    |        |                                                       |         |                                   |   |

|       |                                 |
|-------|---------------------------------|
| TK1   | thymidine kinase 1              |
| TOP2A | topoisomerase (DNA) II<br>alpha |
| TYMS  | thymidylate synthetase          |
| UBD   | ubiquitin D                     |

**Supplementary Table S2: AUROC analyses of non-invasive serum markers.**

|            | <i>HCMini</i> |                                |              | <i>Graft Fibrosis</i> |                                |              | <i>Transcriptional signature of cTCMR</i> |                                |              |
|------------|---------------|--------------------------------|--------------|-----------------------|--------------------------------|--------------|-------------------------------------------|--------------------------------|--------------|
|            | <i>AUC</i>    | <i>95% Confidence interval</i> |              | <i>AUC</i>            | <i>95% Confidence interval</i> |              | <i>AUC</i>                                | <i>95% Confidence interval</i> |              |
| <b>M65</b> | <b>0.621</b>  | <b>0.510</b>                   | <b>0.732</b> | <b>0.629</b>          | <b>0.502</b>                   | <b>0.757</b> | <b>0.679</b>                              | <b>0.530</b>                   | <b>0.828</b> |
| <b>AST</b> | 0.611         | 0.494                          | 0.728        | 0.558                 | 0.433                          | 0.683        | 0.633                                     | 0.468                          | 0.798        |
| <b>ALT</b> | 0.580         | 0.463                          | 0.696        | 0.555                 | 0.432                          | 0.678        | <b>0.804</b>                              | <b>0.694</b>                   | <b>0.914</b> |
| <b>ALP</b> | <b>0.638</b>  | <b>0.530</b>                   | <b>0.746</b> | <b>0.708</b>          | <b>0.602</b>                   | <b>0.815</b> | 0.621                                     | 0.450                          | 0.792        |
| <b>gGT</b> | 0.571         | 0.460                          | 0.682        | <b>0.636</b>          | <b>0.514</b>                   | <b>0.758</b> | 0.602                                     | 0.393                          | 0.812        |

**Supplementary Table S3: Diagnostic fidelity of DSA for detection of subclinical graft injury.**

|                                          | <b>any DSA</b>        |                       | <b>any class II DSA</b> |                       |
|------------------------------------------|-----------------------|-----------------------|-------------------------|-----------------------|
|                                          | <b>MFI &gt; 1,000</b> | <b>MFI &gt; 5,000</b> | <b>MFI &gt; 1,000</b>   | <b>MFI &gt; 5,000</b> |
| <b>Association of DSA with fibrosis:</b> |                       |                       |                         |                       |
| OR (95% CI)                              | 4.2 (1.7-10.7)        | 3.6 (1.9-6.9)         | 3.3 (1.3-8.4)           | 3.7 (1.4-10.2)        |
| Presence of DSA predicted fibrosis       | 33%                   | 33%                   | 32%                     | 36%                   |
| Absence of DSA excluded fibrosis         | 89%                   | 87%                   | 87%                     | 87%                   |
| <b>Association of DSA with HCMini:</b>   |                       |                       |                         |                       |
| OR (95% CI)                              | 0.19 (0.05-0.67)      | 0.20 (0.05-0.91)      | 0.08 (0.01-0.59)        | 0.1 (0.01-0.77)       |
| Presence DSA excluded HCMini             | 92%                   | 93%                   | 97%                     | 96%                   |
| Absence of DSA predicted HCMini          | 31%                   | 30%                   | 28%                     | 28%                   |

## Supplementary References

- 1 Höfer, A. *et al.* DSA Are Associated With More Graft Injury, More Fibrosis, and Upregulation of Rejection-associated Transcripts in Subclinical Rejection. *Transplantation* **104**, 551-561, doi:10.1097/TP.0000000000003034 (2020).
- 2 Taubert, R. *et al.* Hepatic Infiltrates in Operational Tolerant Patients After Liver Transplantation Show Enrichment of Regulatory T Cells Before Proinflammatory Genes Are Downregulated. *American journal of transplantation : official journal of the American Society of Transplantation and the American Society of Transplant Surgeons* **16**, 1285-1293, doi:10.1111/ajt.13617 (2016).
- 3 Bohne, F. *et al.* Intra-graft expression of genes involved in iron homeostasis predicts the development of operational tolerance in human liver transplantation. *The Journal of clinical investigation* **122**, 368-382 (2012).
- 4 McKinney, E. F., Lee, J. C., Jayne, D. R., Lyons, P. A. & Smith, K. G. T-cell exhaustion, co-stimulation and clinical outcome in autoimmunity and infection. *Nature* **523**, 612-616, doi:10.1038/nature14468 (2015).
- 5 Bonaccorsi-Riani, E. *et al.* Molecular Characterization of Acute Cellular Rejection Occurring During Intentional Immunosuppression Withdrawal in Liver Transplantation. *American journal of transplantation : official journal of the American Society of Transplantation and the American Society of Transplant Surgeons* **16**, 484-496, doi:10.1111/ajt.13488 (2016).
- 6 Sis, B. *et al.* Endothelial gene expression in kidney transplants with alloantibody indicates antibody-mediated damage despite lack of C4d staining. *Am J Transplant* **9**, 2312-2323, doi:10.1111/j.1600-6143.2009.02761.x (2009).



# Supplemental Figure S1

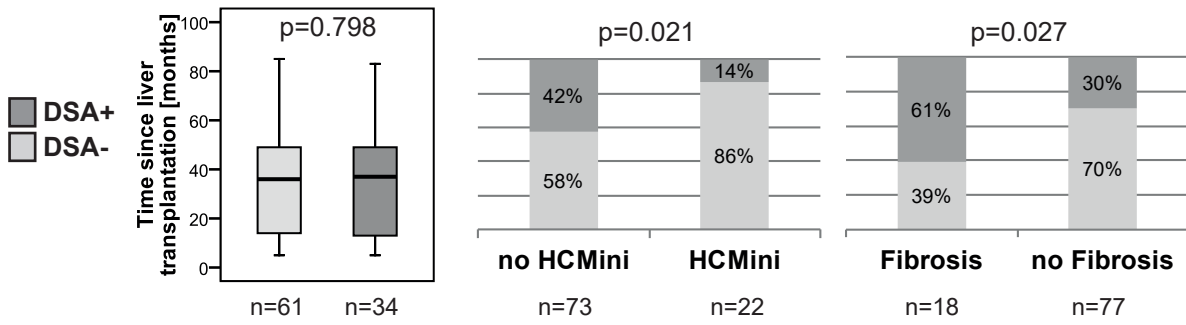

Supplement: 41598_2020_70938_MOESM1_ESM.pdf [file 41598_2020_70938_MOESM1_ESM.pdf]
